# Supplementary material for: Hetero-oligomer of dynamin-related proteins participates in the fission of highly divergent mitochondria from Entamoeba histolytica
Source: PubMed Central journal article supplement (PMC5647421; doi:10.1038/s41598-017-13721-5), 2017-10-18
Supplement: 41598_2017_13721_MOESM1_ESM.pdf [file 41598_2017_13721_MOESM1_ESM.pdf]

1 **Supplementary information:**

2 **Hetero-oligomer of dynamin-related proteins participates in the fission of highly divergent**  
3 **mitochondria from *Entamoeba histolytica***

4

5 Takashi Makiuchi <sup>a\*</sup>, Herbert J. Santos <sup>b</sup>, Hiroshi Tachibana <sup>a</sup>, and Tomoyoshi Nozaki <sup>b,c,d\*</sup>

6

7 <sup>a</sup> Department of Infectious Diseases, Tokai University School of Medicine, 143 Shimokasuya,

8 Isehara, Kanagawa 259-1193, Japan; <sup>b</sup> Department of Parasitology, National Institute of

9 Infectious Diseases, 1-23-1 Toyama, Shinjuku-ku, Tokyo 162-8640, Japan; <sup>c</sup> Graduate School of

10 Life and Environmental Sciences, University of Tsukuba, 1-1-1 Tennodai, Tsukuba, Ibaraki

11 305-8572, Japan; <sup>d</sup> Department of Biomedical Chemistry, Graduate School of Medicine, the

12 University of Tokyo, 7-3-1 Hongo, Bunkyo-ku, Tokyo 113-0033, Japan

13

14 \* Corresponding authors: T. Makiuchi and T. Nozaki

15 TM; E-mail: makky@tokai-u.jp; Phone: +81(Japan)-463-93-1121 ext. 2600; Fax:

16 +81-463-95-5450

17 TN; E-mail: nozaki@m.u-tokyo.ac.jp; Phone: +81(Japan)-3-5841-3526; Fax: +81-3-5841-3444

18 **Legends of Supplementary Figures**

19 **Supplementary Fig. S1**

20 Domain prediction of EhDRPs by Pfam. The human (*Homo sapiens*, Hs) Drp1 (NP\_036192),  
21 which is involved in mitochondrial fission, was predicted to contain a dynamin family GTPase  
22 domain (green box), a middle domain (red box), and a GTPase effector domain (blue box) based  
23 on Pfam analysis. The same three domains were likewise detected in human dynamin 1 (HsDyn1:  
24 NP\_004399) in addition to the pleckstrin homology (PH) domain (orange box), whereas only the  
25 dynamin family GTPase domain was predicted in human Opa1 (HsOpa1: AAH75805). HsOpa1,  
26 a protein involved in mitochondrial inner membrane fusion, also contains a mitochondrial  
27 targeting sequence (MTS) and a transmembrane region (TM). *E. histolytica* possesses four genes  
28 for DRPs (EhDrpA, EhDrpB, EhDrpC, and EhDrpD) in its genome. The previously reported *E.*  
29 *histolytica* DLP1 (dynamin-like protein 1)<sup>1</sup>, is designated here as EhDrpA for uniformity among  
30 the four EhDRPs in this study. The corresponding *e*-values calculated by the Pfam prediction are  
31 indicated in the boxes. The amino acid stretch depicted in EhDrpC corresponds to the putative  
32 nuclear localization signal predicted by the cNLS Mapper.

33

34 **Supplementary Fig. S2**

35 Confirmation of the expression of HA-tagged EhDrpA-D by immunoblot assay. The left panel  
36 shows the immunoblot reacted with anti-HA mouse monoclonal antibody (HA.11 16B12), while  
37 the right panel corresponds to the blot stained with anti-CS1 rabbit antibody (as a loading  
38 control)<sup>2</sup>. Predicted sizes of EhDrpA-HA, EhDrpB-HA, EhDrpC-HA, and EhDrpD-HA are about  
39 80.5-, 78.3-, 94.6-, and 94.1-kDa, respectively. Each lane contains 10 µg protein.

40

41 **Supplementary Fig. S3**

42 Confocal immunofluorescence images and fluorescence intensity profiles of *E.*  
43 *histolytica* transformants expressing EhDRP-HA. These images were acquired as shown in Fig. 2.  
44 The line color in graphs on the bottom panels corresponds to the respective fluorescence color in  
45 immunofluorescence images. Scale bar = 10  $\mu$ m. Bottom graphs show the profile of fluorescence  
46 intensities on the line from the merged fluorescence micrographs. Each image of EhDrpC-HA  
47 and EhDrpD-HA strains on the left is identical to one shown in Fig. 2.

48

49 **Supplementary Fig. S4**

50 Scatter plots of the distribution of fluorescence signals for the evaluation of co-localization  
51 between EhDRP-HA and APSK or TOTO-3. The plots were created and analyzed using the  
52 “Coloc” option in Imaris<sup>®</sup> software (Ver. 6. 2. 1, Bitplane). The Diagrams shown in red and blue  
53 boxes were generated from images in Fig. 2 and Supplementary Fig. S3, respectively. The  
54 diagrams in yellow and green boxes were generated from images of EhDrpC-HA  
55 and EhDrpD-HA strains shown on the right side in Supplementary Fig. S3, respectively.  
56 Horizontal and vertical axes for each diagram are depicted at the bottom and top of the figure.  
57 Values ( $r$ ) in parentheses indicate Pearson correlation coefficient.

58

59 **Supplementary Fig. S5**

60 (a) Comparison of DRPs between human and *E. histolytica*. Multiple alignment of a partial  
61 GTPase domain in EhDRPs, together with the human Drp1. The lysine residue (K) that plays an  
62 important role in the GTPase activity is highlighted<sup>1,3</sup>. This residue was mutated into alanine to  
63 create GTPase-deficient DRPs. Asterisks and dots indicate identical and similar amino acid  
64 residues, respectively. (b) Verification of the expression of GTPase-deficient mutants of EhDrpA,

65 B, C, and D. Expression of HA-tagged mutant EhDRPs was induced with 5 µg/ml Tet. Whole  
66 cell lysates (15 µg protein) of each strain cultured with (+) or without (-) Tet were subjected to  
67 SDS-PAGE and immunoblot analysis with either anti-HA antibody (left panel) or anti-CS1  
68 antibody (right panel). The expression of EhDrpD(K121A)-HA was leaky as it was observed  
69 even in the absence of Tet induction (see also Supplementary Fig. S5c). (c) Multiple alignment of  
70 the amino terminus of DrpD among five *Entamoeba* species. Two potential initiation codons, as  
71 highlighted in green, are conserved in *Entamoeba* DrpDs. Asterisks and dots indicate identical  
72 and similar amino acid residues, respectively.

73

#### 74 **Supplementary Fig. S6**

75 Construction scheme and map of the tetracycline (Tet)-inducible expression vector with  
76 neomycin resistance marker: pEhTex/HA. The upper panel shows a schematic diagram  
77 summarizing the construction process of pEhTex/HA. The black boxes labeled Neo and Hyg  
78 represent resistance genes for neomycin and hygromycin, while the pink boxes labeled TetR and  
79 TetO indicate the gene of the Tet repressor and operator sequences, respectively. The gray boxes  
80 labeled Lec5' and 3', the white boxes labeled Actin 5' and 3', and the yellow boxes labeled CS 5'  
81 and 3', indicate the positions of the 5'- and 3'-untranslated regions (UTR) of Lec (a heavy subunit  
82 of Gal/GalNAc lectin: XP\_656181), actin, and CS1 genes, respectively. The region containing  
83 TetR to TetO of pEhHygtetR O cass vector<sup>4,5</sup> was PCR amplified using specific primers (pink  
84 arrows) containing the sequence needed for the In-Fusion system (broken lined boxes) at each 5'  
85 end. The red boxes represent the sequence of three copies of the hemagglutinin (HA) tag. The  
86 amplified fragment was inserted into pEhEx/HA<sup>6</sup> digested with *Bgl* II. The lengths in the scheme  
87 are not proportional to the actual numbers of nucleotides. The lower panel indicates the  
88 nucleotide sequence near the cloning site of pEhTex/HA. The newly constructed vector



89 pEhTex/HA has three main features absent in pEhHygtetRO cass vector. First, the cloning sites  
90 in pEhEx<sup>5</sup> and pEhTex/HA are interchangeable. Second, selection after transfection is by  
91 neomycin treatment, a more convenient approach compared with hygromycin selection. Third,  
92 like pEhEx<sup>7</sup>, pEhTex/HA can be used for the expression of a second protein by cloning in the  
93 single *Spe* I site.

94

#### 95 **Supplementary Fig. S7**

96 Growth kinetics of *E. histolytica* trophozoites expressing a GTPase-deficient DRP mutant.  
97 Transformants were cultured with [Tet (+)] (red) or without [Tet (-)] (blue) 5 µg/ml Tet, and cell  
98 densities were monitored at indicated time points. Error bars represent standard deviations of  
99 three replicates. \*  $P < 0.05$  (Student's t-test).

100

#### 101 **Supplementary Fig. S8**

102 (a) Detection of EhDrpA and EhDrpB in whole cell lysate and immunoprecipitated samples by  
103 anti-EhDRP antibodies. Lane 1: immunoprecipitated (IP) sample by antiserum against DrpB.  
104 Lane 2: IP sample by antiserum against DrpA. Lane 3: IP sample by anti-DrpB antibody. Lane 4:  
105 IP sample by anti-DrpA antibody. Lane 5: IP sample by anti-HA antibody. Lane 6: mock IP  
106 sample carried out without antibody. Lane 7: whole trophozoite lysate (WTL) of *E. histolytica*  
107 HM-1:IMSS cl6. Approximately 20 µg of WTL protein or approximately 150 µg of  
108 immunoprecipitated protein per lane were subjected to SDS-PAGE and immunoblot analysis (left  
109 and right panels are results of anti-DrpA and anti-DrpB antibodies, respectively). Anti-DrpA and  
110 anti-DrpB antibodies can detect EhDrpA and EhDrpB as a major band in the lanes loaded with IP  
111 sample by anti-DrpA and anti-DrpB antibodies, respectively, although anti-DrpB antibody has  
112 nonspecific reaction in WTL lane. Moreover, the reactivity of anti-DrpB antibody to EhDrpB was

113 also demonstrated in the immunoblots of strains expressing EhDrpB-HA (Supplementary Fig.  
114 S10) as well as in recombinant EhDrpB (Supplementary Fig. S12b). (b) Comparison of protein  
115 expression among control, *DrpAgs*, and *DrpBgs* strains. Fresh samples for immunoblot analysis  
116 were prepared from three independent cultures. DrpA, DrpB, APSK, and CS1 indicate  
117 immunoblots reacted with anti-DrpA, anti-DrpB, anti-APSK, and anti-CS1 antibodies,  
118 respectively. Membranes in the 1st trial were cut prior to reaction with respective antibodies. The  
119 2<sup>nd</sup> and 3<sup>rd</sup> trials were performed at the same time, following a similar procedure to that of the 1st  
120 trial, with the samples loaded on the same gel. Approximately 20 µg of WTL protein per lane  
121 was subjected to SDS-PAGE. Bands marked with arrowheads indicate target proteins and band  
122 intensities for Fig. 4a were measured using the bands in Supplementary Fig. S8b.

123

#### 124 **Supplementary Fig. S9**

125 Alignment of mitosome-associated EhDRPs and putative post-translational modification sites.  
126 The asterisks indicate conserved amino acids. Prediction of phosphorylation sites was performed  
127 using the NetPhos program (<http://www.cbs.dtu.dk/services/NetPhos/>). Residues in red, blue, and  
128 green are the predicted phosphorylation sites with high (score > 0.9), intermediate (0.8-0.9), and  
129 low (< 0.8) probabilities respectively. Putative sumoylation motifs with high (red boxes) and low  
130 (blue boxes) probabilities were predicted using the SUMOplot program  
131 (<http://www.abgent.com/sumoplot>). The regions used to raise anti-DRP antibodies are  
132 highlighted in gray.

133

#### 134 **Supplementary Fig. S10**

135 Immunoprecipitation of EhDrpA and EhDrpB from EhDrpA-HA and EhDrpB-HA strains. The *E.*  
136 *histolytica* line transfected with pEhEx/HA empty vector was used as control. EhDRPs were

137 immunoprecipitated from 1 mg proteins of whole cell lysates of each strain. W.B. denotes  
138 antibodies that were used in the immunoblot assay. IP indicates antibodies or antisera used for  
139 immunoprecipitation. Immunoprecipitation was also carried out without antibody (“w/o Ab”).  
140 Broken boxes were clipped and magnified as shown in Fig. 5a. Approximately 150 µg of  
141 immunoprecipitated protein per lane was subjected to SDS-PAGE and immunoblot analysis.  
142 Immunoblot assays using strains expressing EhDrpA-HA or EhDrpB-HA were carried out  
143 independently from those using control strain. Individual membranes were stained with either  
144 anti-HA, anti-DrpA, or anti-DrpB antibodies respectively.

145

#### 146 **Supplementary Fig. S11**

147 Immunoblot analysis of EhDRP complex in *DRPgs* strains. Lysates of trophozoites from *DrpAgs*,  
148 *DrpBgs*, and control transformants were subjected to BN-PAGE. After blotting, the samples  
149 were reacted with either anti-DrpA or anti-DrpB antibodies. Lanes were labeled as *DrpAgs* and  
150 *DrpBgs*, for the strains in which either *EhDrpA* or *EhDrpB* gene was silenced, and control for the  
151 transformant transfected with an empty vector. The arrowhead indicates the major band (about  
152 900-kDa) that was used as reference to compare the amount of DRP oligomer among strains. The  
153 intensities of the bands on immunoblots were measured and the relative amounts of the proteins  
154 were estimated as shown in Fig. 5b. Each lane contains 20 µg protein.

155

#### 156 **Supplementary Fig. S12**

157 Quantification of EhDrpA and EhDrpB using recombinant histidine (His<sub>6</sub>)-tagged EhDRP-HA  
158 proteins as standards. (a) Coomassie Brilliant Blue (R-250) staining of recombinant  
159 His<sub>6</sub>-EhDRP-HA proteins purified from bacteria. Each lane contains 5 pmol recombinant protein.  
160 (b) Immunoblot analyses for the quantification of EhDRPs. Anti-DrpA and anti-DrpB antibodies

161 were used to immunoprecipitate the EhDrpA-EhDrpB complex from *E. histolytica* trophozoites.  
162 One mg protein from whole cell lysates was used in immunoprecipitation (IP). Each lane of  
163 SDS-PAGE was loaded with 3 %, 9 %, and 9 % (in volume) of the total immunoprecipitated  
164 samples with anti-DrpA or anti-DrpB antibody, and without antibody, respectively. Intensities of  
165 the corresponding EhDRP bands in immunoblots were measured and the amounts/molecular  
166 numbers of the proteins were estimated using standard curves shown in Fig. 5c.

167

### 168 **Supplementary Fig. S13**

169 The constriction site-like structures (CLSs) on the *E. histolytica* mitosome. (a) Immunoelectron  
170 micrograph of an *E. histolytica* mitosome with a CLS. (b) Yellow lines indicate the positions  
171 used for measuring the CLSs and the diameter of mitosomes. (c) A representative image of *E.*  
172 *histolytica* mitosomes. Immunoelectron microscopic observation was performed as previously  
173 described<sup>8-10</sup>. Gold particles indicate the localization of chaperonin 60 (Cpn60), a marker protein  
174 of *E. histolytica* mitosomes. Scale bar = 200 nm. (d) Comparison of lengths of CLSs ( $n = 11$ ) and  
175 mitosome diameter ( $n = 22$ ). Error bars and  $p$ -values denote standard deviations and the result of  
176 Student's t-test, respectively.

177

### 178 **Supplementary Fig. S14**

179 Expression level of DrpA and DrpB homologs during stage conversion of *E. invadens*. (a)  
180 Expression profile of EhDRP homologs during encystation. This profile was based on our  
181 previous paper published by De Cadiz, A. E., *et al*<sup>11</sup>. The horizontal axis shows the time (in  
182 hours) after induction of encystation, while the vertical axis demonstrates the fold changes of the  
183 transcripts of *E. invadens* DRP homologs relative to their expression level at the trophozoite  
184 stage (i.e., Time 0). The broken lines denote the level of EhDrpA (red) and EhDrpB (blue)

185 transcripts that presented the mitosome elongation phenotype in *EhDrpA* and *EhDrpB*  
186 gene-silenced strains as shown in Fig. 4. (b) The transcript levels of *E. invadens* *DRP* homologs  
187 relative to the trophozoite stage at 2 hours post-induction of excystation. This profile was based  
188 on a previous paper published by Ehrenkaufner, G. M. *et al*<sup>12</sup>.

189

#### 190 **Supplementary Fig. S15**

191 Immunoblot analysis of phosphorylated EhDrpA and EhDrpB. Strains expressing EhDrpA-HA,  
192 EhDrpB-HA, and control transformant (transfected with an empty vector), were used in this  
193 analysis. Immunoprecipitation by anti-HA antibody was performed with PhosSTOP<sup>®</sup>  
194 phosphatase inhibitor cocktail (Roche). After immunoprecipitation, the proteins were separated  
195 by SDS-PAGE using 6% acrylamide gel containing 50  $\mu$ M Phos-tag<sup>TM</sup> (Wako Pure Chemical  
196 Industries, Ltd., Osaka, Japan) followed by immunoblot analysis using anti-HA antibody. Closed  
197 and open arrowheads indicate unmodified and phosphorylated EhDrpA-HA (red) and  
198 EhDrpB-HA (blue) respectively. Red and blue asterisks indicate His<sub>6</sub>-EhDrpA-HA and  
199 His<sub>6</sub>-EhDrpB-HA treated with AcTEV<sup>TM</sup> protease (Life Technologies) respectively, however the  
200 His-tag was not cleaved by this treatment.

201

202

#### 203 **Supplementary Table. S1**

204 List of proteins known to be involved in mitochondrial dynamics<sup>13-17</sup>

205

#### 206 **Supplementary Table. S2**

207 List of primers

208 **References**

- 209 1 Jain, R., Shrimal, S., Bhattacharya, S. & Bhattacharya, A. Identification and partial  
210 characterization of a dynamin-like protein, EhDLP1, from the protist parasite *Entamoeba*  
211 *histolytica*. *Eukaryot Cell* **9**, 215-223, doi:10.1128/EC.00214-09 (2010).
- 212 2 Nozaki, T. *et al.* Molecular cloning and characterization of the genes encoding two  
213 isoforms of cysteine synthase in the enteric protozoan parasite *Entamoeba histolytica*.  
214 *Mol. Biochem. Parasitol.* **97**, 33-44 (1998).
- 215 3 Smirnova, E., Shurland, D. L., Ryazantsev, S. N. & van der Blik, A. M. A human  
216 dynamin-related protein controls the distribution of mitochondria. *J. Cell Biol.* **143**,  
217 351-358 (1998).
- 218 4 Hamann, L., Buss, H. & Tannich, E. Tetracycline-controlled gene expression in  
219 *Entamoeba histolytica*. *Mol. Biochem. Parasitol.* **84**, 83-91 (1997).
- 220 5 Ramakrishnan, G., Vines, R. R., Mann, B. J. & Petri, W. A., Jr. A tetracycline-inducible  
221 gene expression system in *Entamoeba histolytica*. *Mol. Biochem. Parasitol.* **84**, 93-100  
222 (1997).
- 223 6 Nakada-Tsukui, K., Okada, H., Mitra, B. N. & Nozaki, T.  
224 Phosphatidylinositol-phosphates mediate cytoskeletal reorganization during phagocytosis  
225 via a unique modular protein consisting of RhoGEF/DH and FYVE domains in the  
226 parasitic protozoon *Entamoeba histolytica*. *Cell. Microbiol.* **11**, 1471-1491,  
227 doi:10.1111/j.1462-5822.2009.01341.x (2009).
- 228 7 Saito-Nakano, Y., Yasuda, T., Nakada-Tsukui, K., Leippe, M. & Nozaki, T.  
229 Rab5-associated vacuoles play a unique role in phagocytosis of the enteric protozoan  
230 parasite *Entamoeba histolytica*. *J. Biol. Chem.* **279**, 49497-49507,  
231 doi:10.1074/jbc.M403987200 (2004).

- 232 8 Mi-ichi, F., Makiuchi, T., Furukawa, A., Sato, D. & Nozaki, T. Sulfate activation in  
233 mitochondria plays an important role in the proliferation of *Entamoeba histolytica*. *PLoS*  
234 *Negl. Trop. Dis.* **5**, e1263, doi:10.1371/journal.pntd.0001263 (2011).
- 235 9 Baba, M. Electron microscopy in yeast. *Methods Enzymol.* **451**, 133-149,  
236 doi:10.1016/S0076-6879(08)03210-2 (2008).
- 237 10 Santos, H. J. *et al.* A novel Mitosomal  $\beta$ -barrel Outer Membrane Protein in *Entamoeba*.  
238 *Sci. Rep.* **5**, 8545, doi: 10.1038/srep08545 (2015).
- 239 11 De Cadiz, A. E., Jeelani, G., Nakada-Tsukui, K., Caler, E. & Nozaki, T. Transcriptome  
240 analysis of encystation in *Entamoeba invadens*. *PLoS One* **8**, e74840,  
241 doi:10.1371/journal.pone.0074840 (2013).
- 242 12 Ehrenkaufer, G. M. *et al.* The genome and transcriptome of the enteric parasite  
243 *Entamoeba invadens*, a model for encystation. *Genome Biol.* **14**, R77,  
244 doi:10.1186/gb-2013-14-7-r77 (2013).
- 245 13 Roy, M., Reddy, P. H., Iijima, M. & Sesaki, H. Mitochondrial division and fusion in  
246 metabolism. *Curr. Opin. Cell Biol.* **33**, 111-118, doi:10.1016/j.ceb.2015.02.001 (2015).
- 247 14 Wienke, D. C., Knetsch, M. L., Neuhaus, E. M., Reedy, M. C. & Manstein, D. J.  
248 Disruption of a dynamin homologue affects endocytosis, organelle morphology, and  
249 cytokinesis in *Dictyostelium discoideum*. *Mol. Biol. Cell* **10**, 225-243 (1999).
- 250 15 Schimmel, B. G., Berbusse, G. W. & Naylor, K. Mitochondrial fission and fusion in  
251 *Dictyostelium discoideum*: a search for proteins involved in membrane dynamics. *BMC*  
252 *Res. Notes* **5**, 505, doi:10.1186/1756-0500-5-505 (2012).
- 253 16 Leger, M. M. *et al.* An ancestral bacterial division system is widespread in eukaryotic  
254 mitochondria. *Proc. Natl. Acad. Sci. U. S. A.* **112**, 10239-10246,  
255 doi:10.1073/pnas.1421392112 (2015).

256 17 Sesaki, H. & Jensen, R. E. Ugo1p links the Fzo1p and Mgm1p GTPases for mitochondrial  
257 fusion. *J. Biol. Chem.* **279**, 28298-28303, doi:10.1074/jbc.M401363200 (2004).



Makiuchi et al. Supplementary Fig. S1

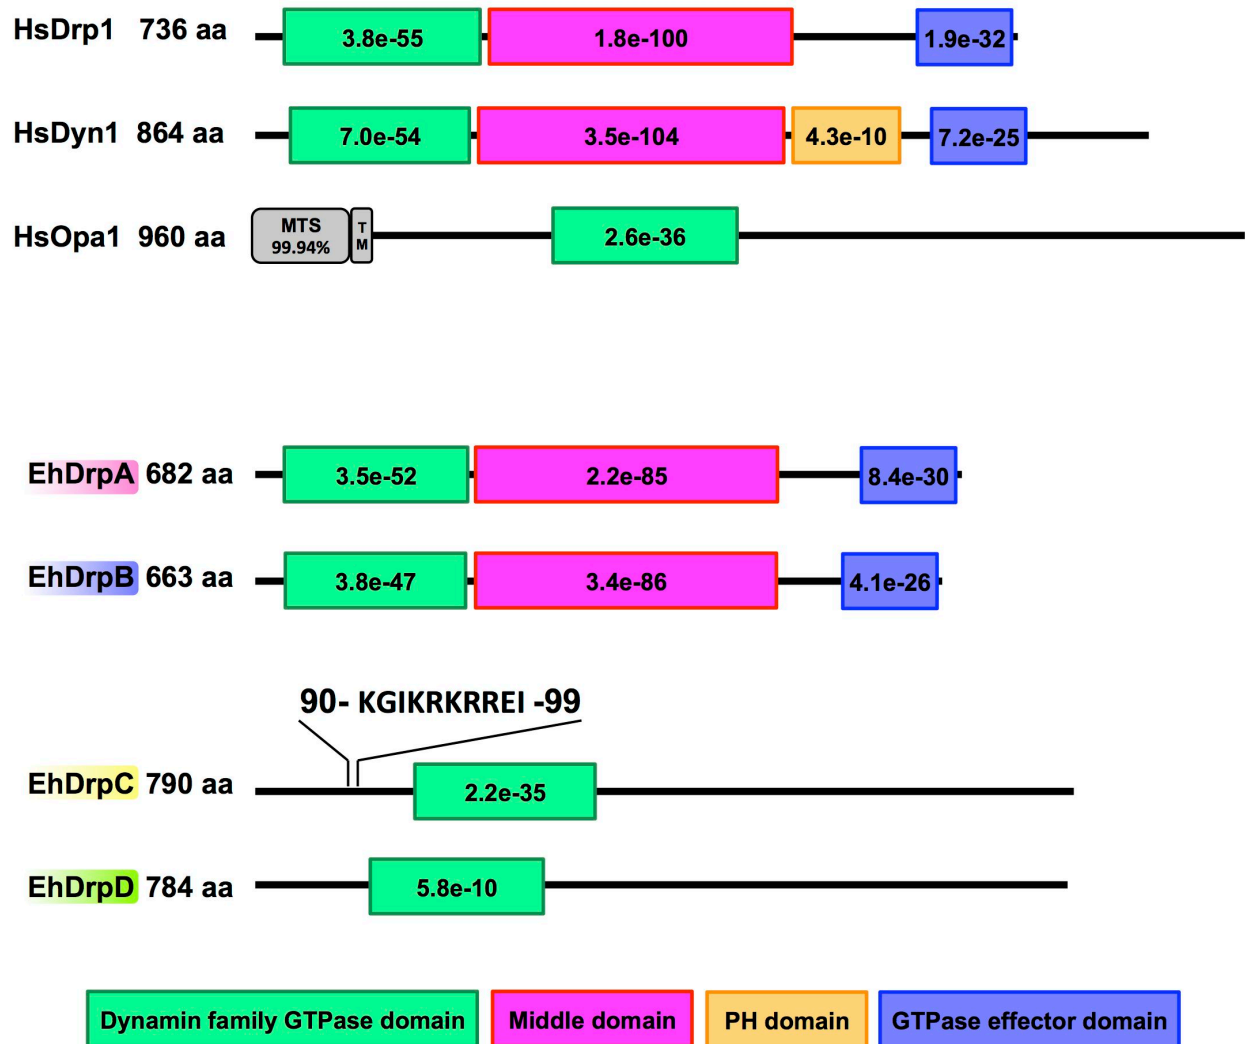

Makiuchi et al. Supplementary Fig. S2

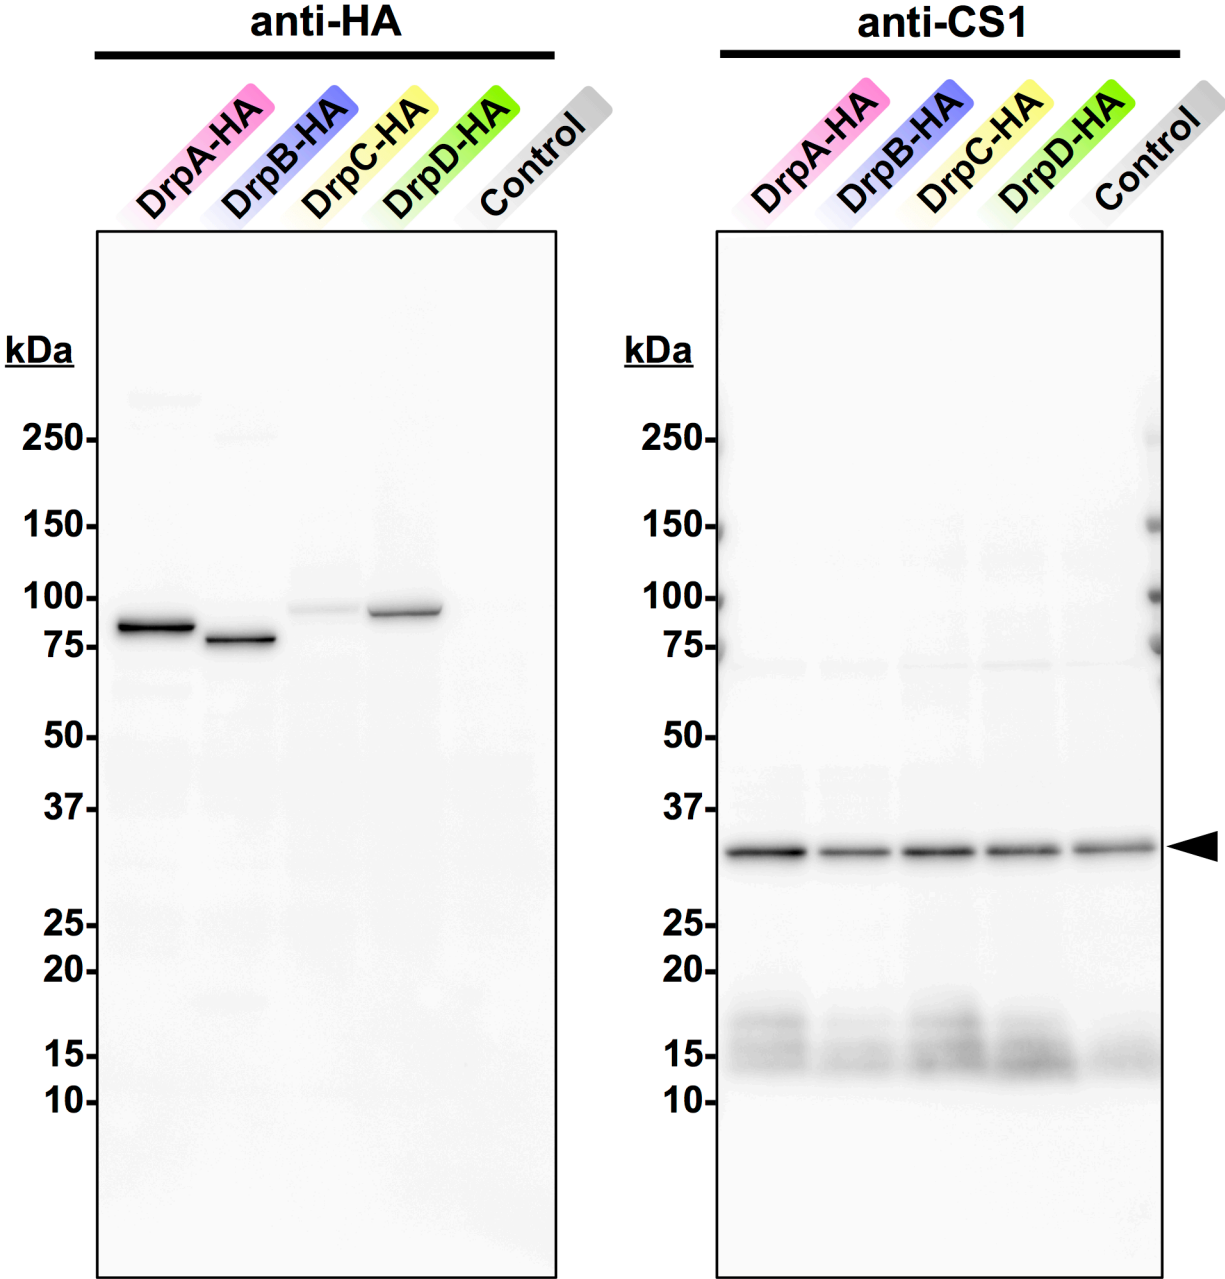

Makiuchi et al. Supplementary Fig. S3

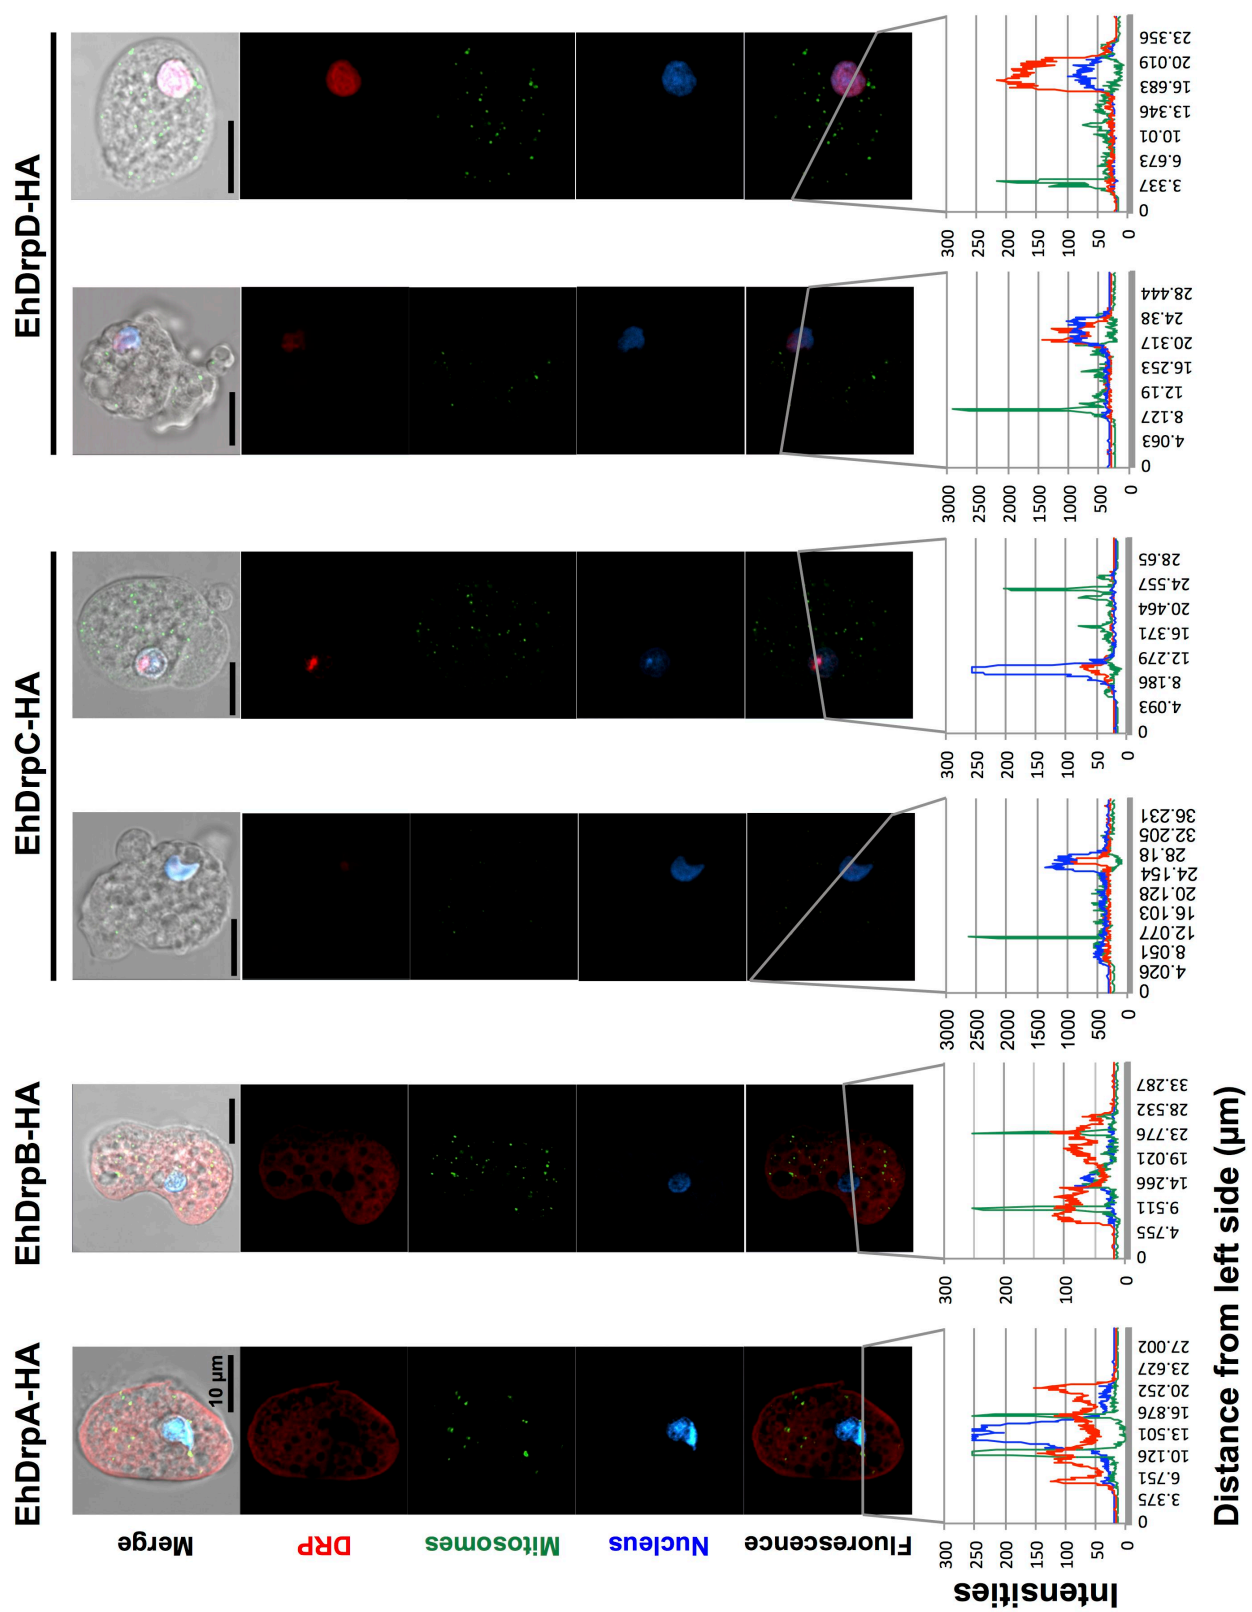

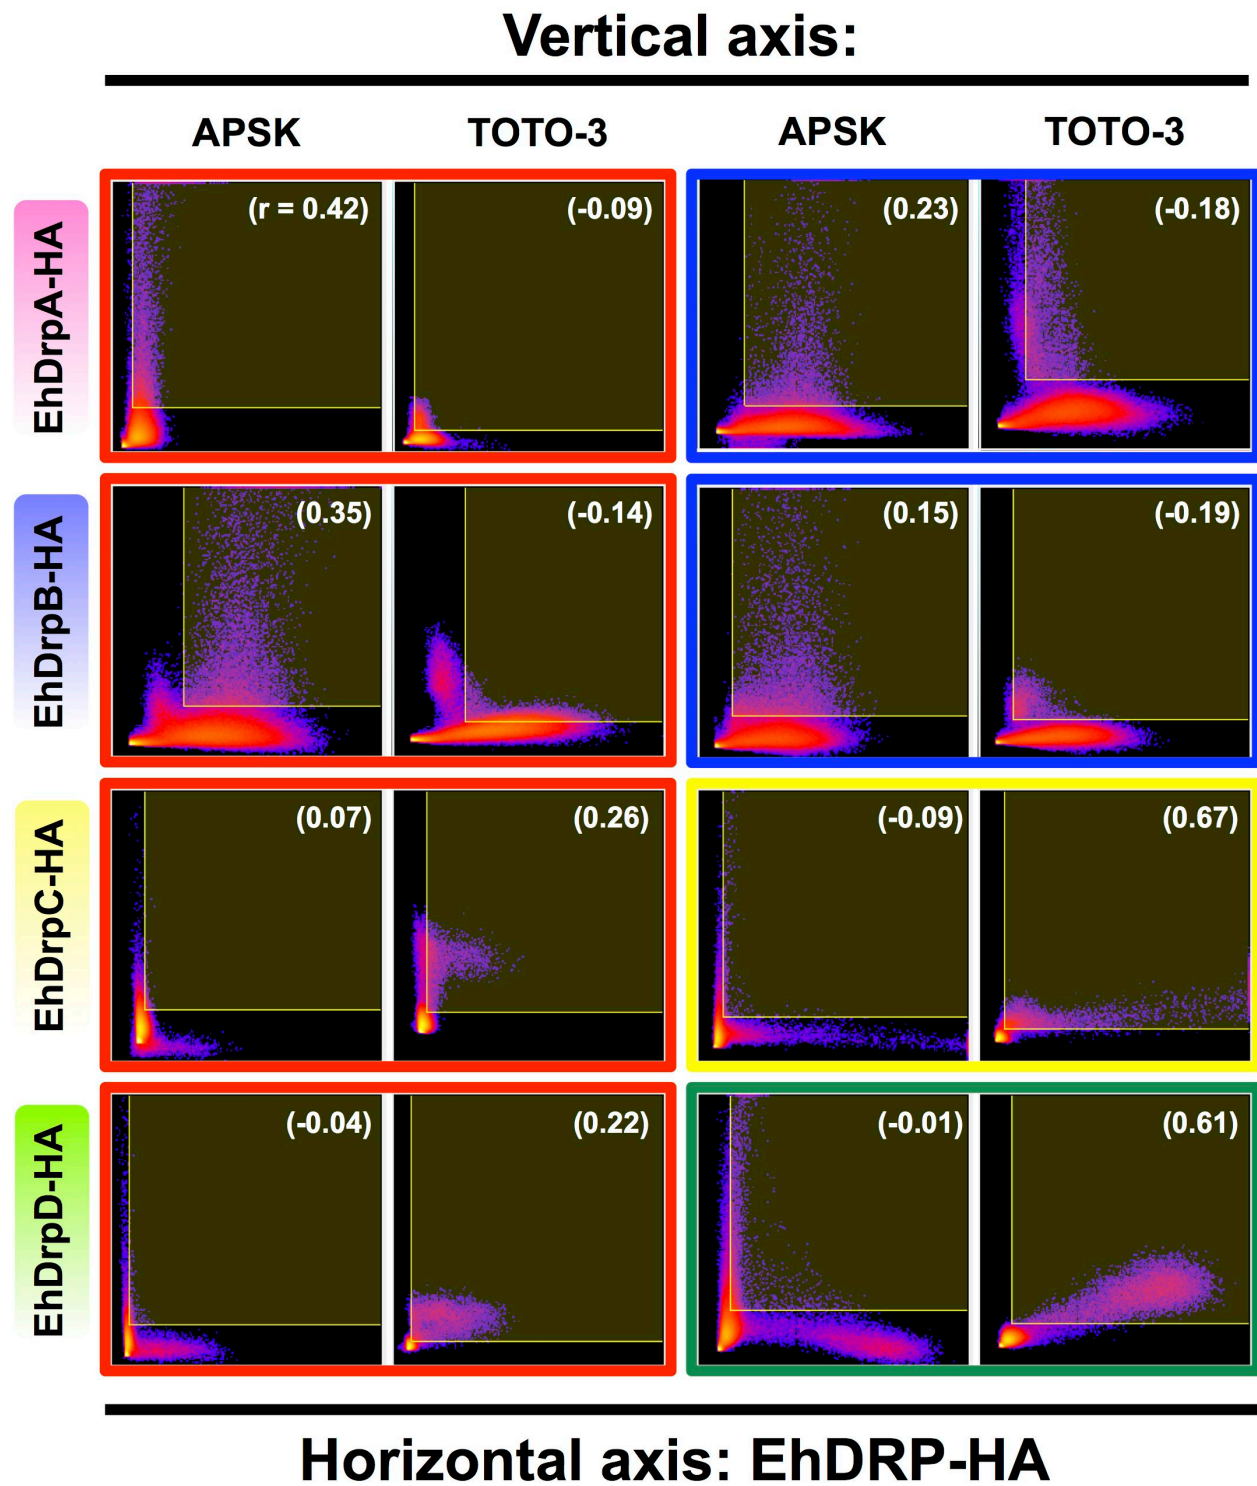

Makiuchi et al. Supplementary Fig. S5

**a**

|               |     |       |       |         |          |        |          |     |
|---------------|-----|-------|-------|---------|----------|--------|----------|-----|
| <b>HsDrp1</b> | 28  | IVVVG | QSSG  | KSSVLES | LVGRDLL  | PRGTG  | IIVTRRPL | 63  |
| <b>EhDrpA</b> | 28  | IVVGS | QSAG  | KSSVLES | IVGRDFL  | PRGSG  | MVTKRPL  | 63  |
| <b>EhDrpB</b> | 29  | IVVGS | QSSG  | KSSVLEH | VVGKDFL  | PRGSG  | IIVTRRPL | 64  |
| <b>EhDrpC</b> | 154 | IVVGM | QSDG  | KSSFIEA | LVGFQFN  | VVEST  | IGTRRPL  | 189 |
| <b>EhDrpD</b> | 111 | IIITG | IQGSG | KSELVEG | IVGMPIEY | INTSTA | TVPVI    | 146 |

\* . . . \* \* . . . \*\*\* . . . \* \* \* . . . . . . . . . \* . . . \*

**b**

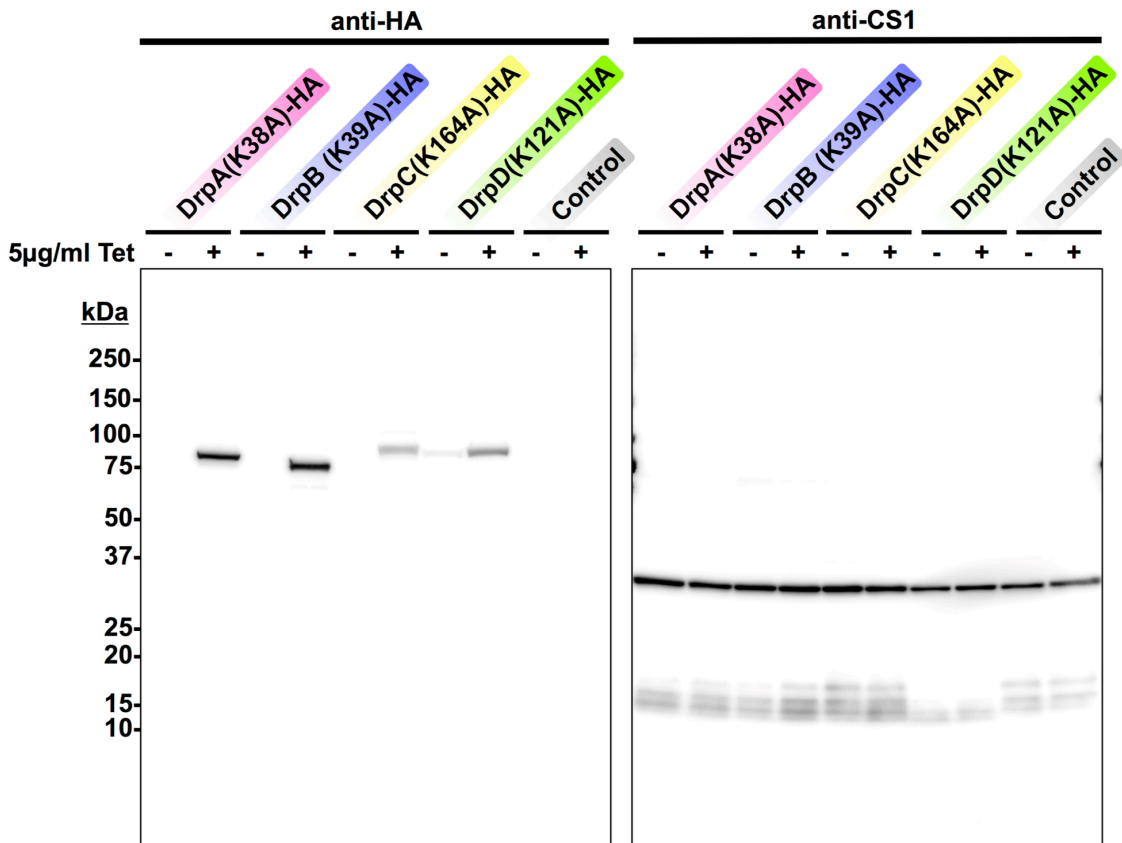

**c**

|                       |   |        |        |       |       |       |      |       |    |       |    |
|-----------------------|---|--------|--------|-------|-------|-------|------|-------|----|-------|----|
| <i>E. histolytica</i> | 1 | MSSTQV | VRDILQ | VAKG  | LPPSQ | QSTQN | IRSI | EEMAR | 36 |       |    |
| <i>E. nuttalli</i>    | 1 | MSSTQV | VRDILQ | VAKG  | LPPSQ | QSTQN | IRSI | EEMAR | 36 |       |    |
| <i>E. dispar</i>      | 1 | MSSTQV | VRDILQ | VAKG  | LPPSQ | QSTQN | IRSI | EEMAR | 36 |       |    |
| <i>E. invadens</i>    | 1 | MTSTQ  | TMR    | EILQA | AKG   | LPA   | SQ   | STQNM | NI | EEMAR | 36 |
| <i>E. moshkovskii</i> | 1 | MTSTQV | VRDILQ | VAKG  | LPPSQ | QSTQN | IRSI | EEMAR | 36 |       |    |

\* . \*\*\* . . \* . \*\*\* . \*\*\* \*\* . . . \*\*\*\*\* . . . \*\*\*\*\*

Makiuchi et al. Supplementary Fig. S6

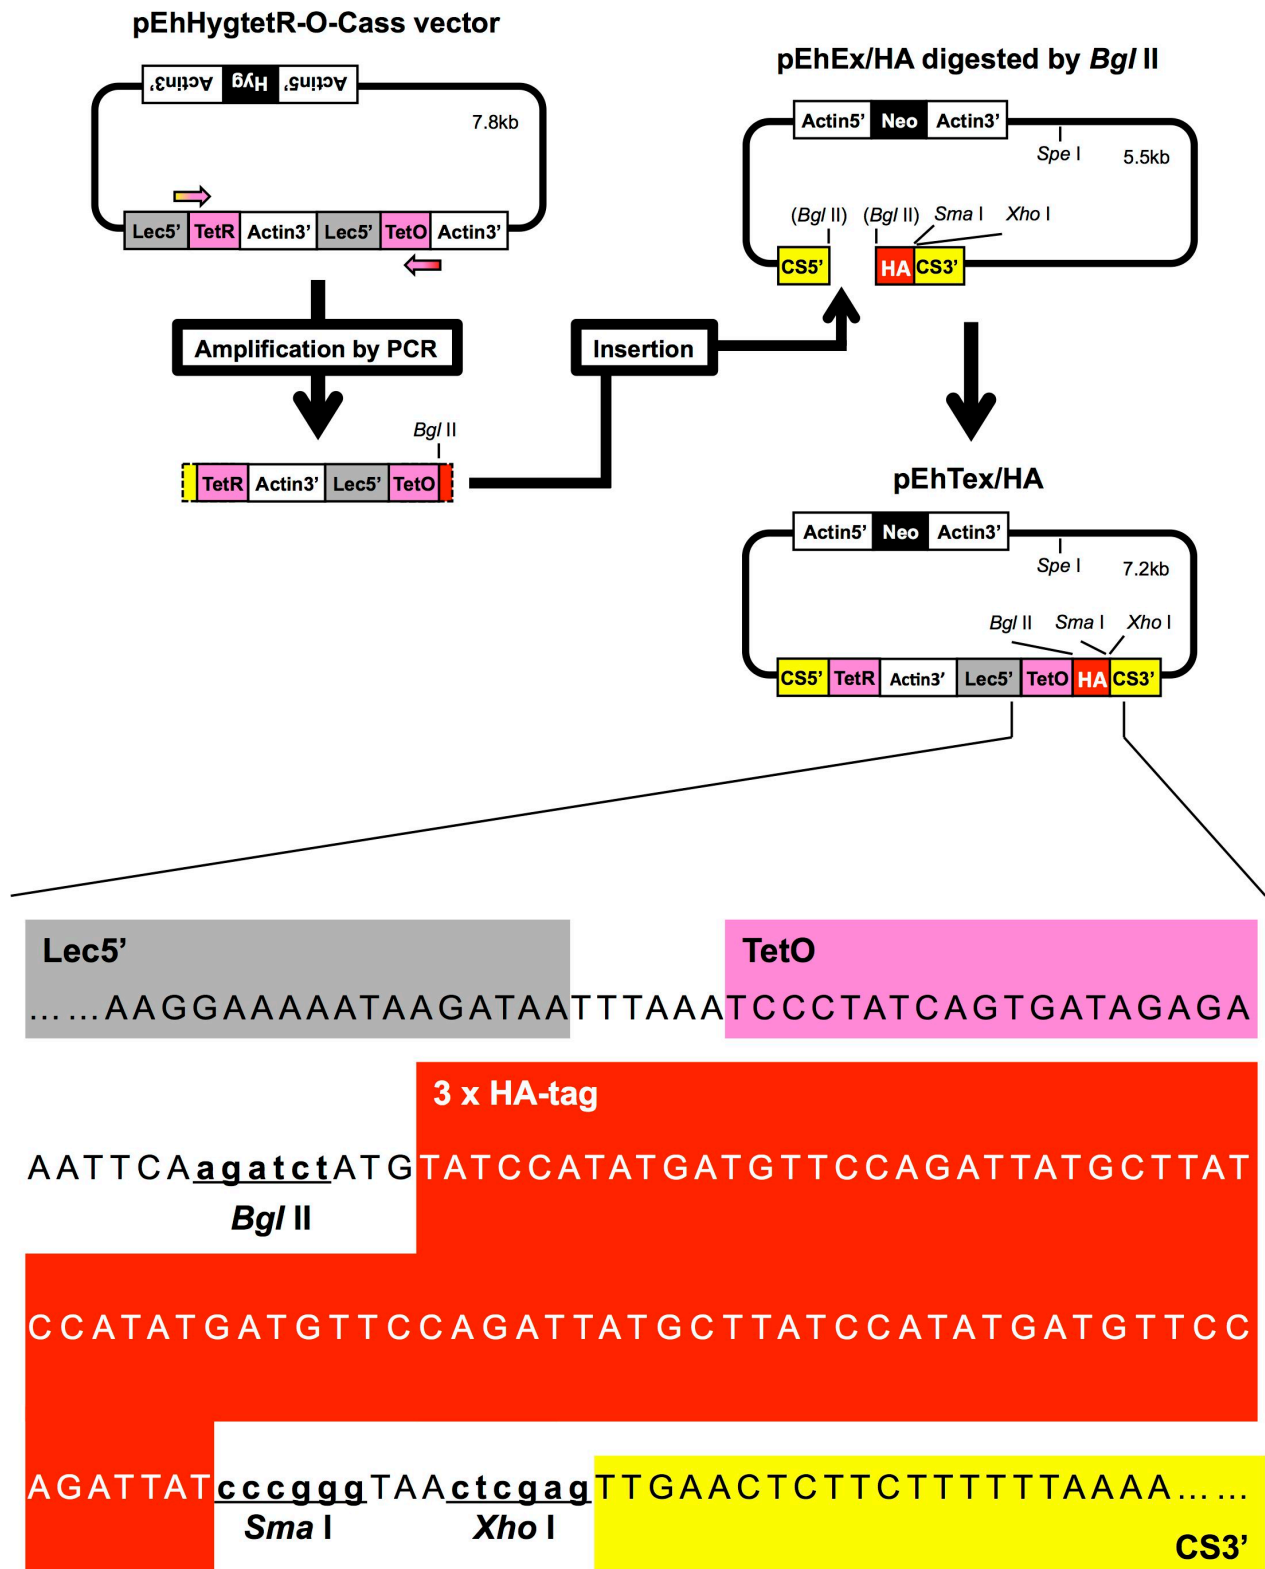

Makiuchi et al. Supplementary Fig. S7

a; DrpA(K38A)-HA

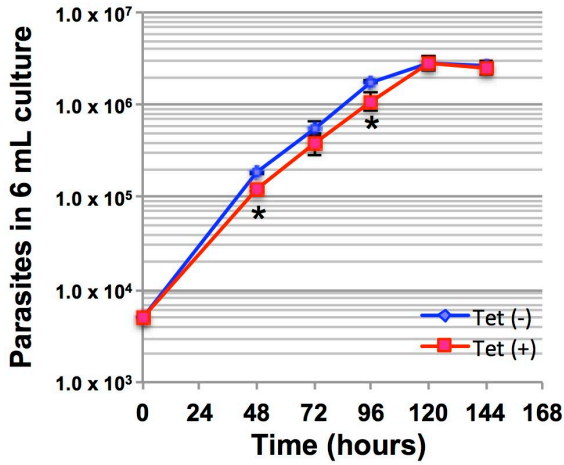

b; DrpB(K39A)-HA

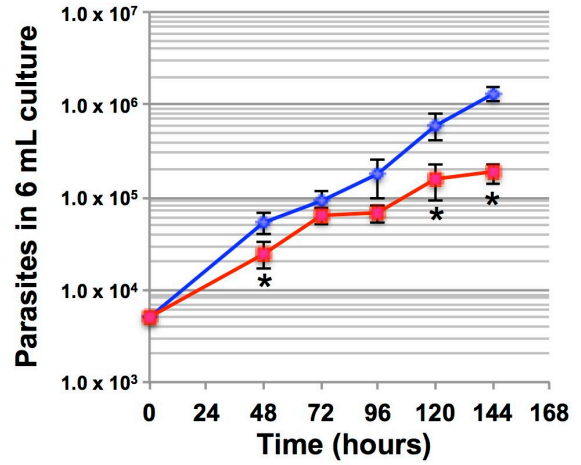

c; DrpC(K164A)-HA

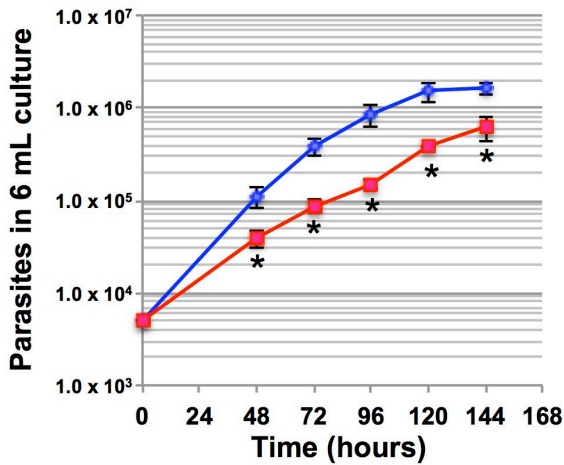

d; DrpD(K121A)-HA

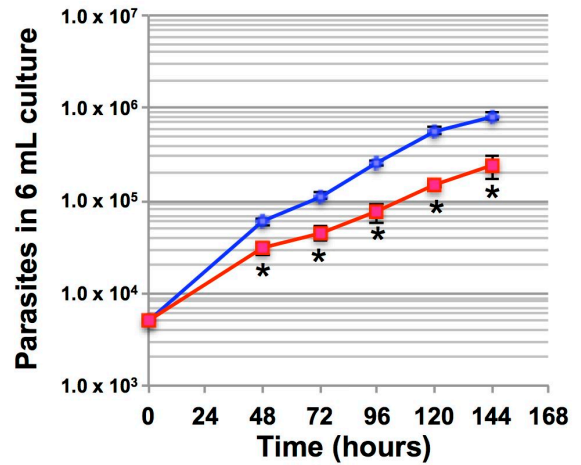

e; Control (pEhTex/HA empty-vector)

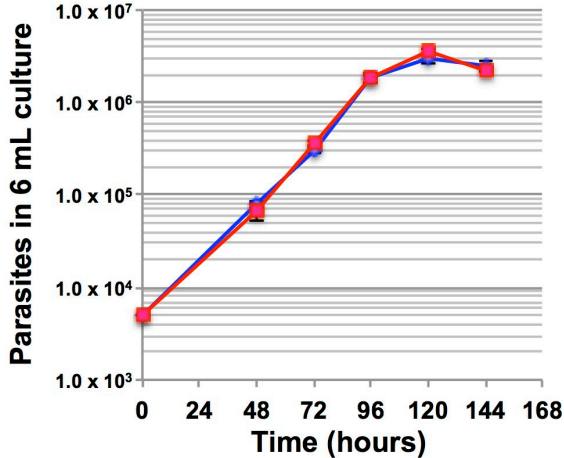



Makiuchi et al. Supplementary Fig. S8

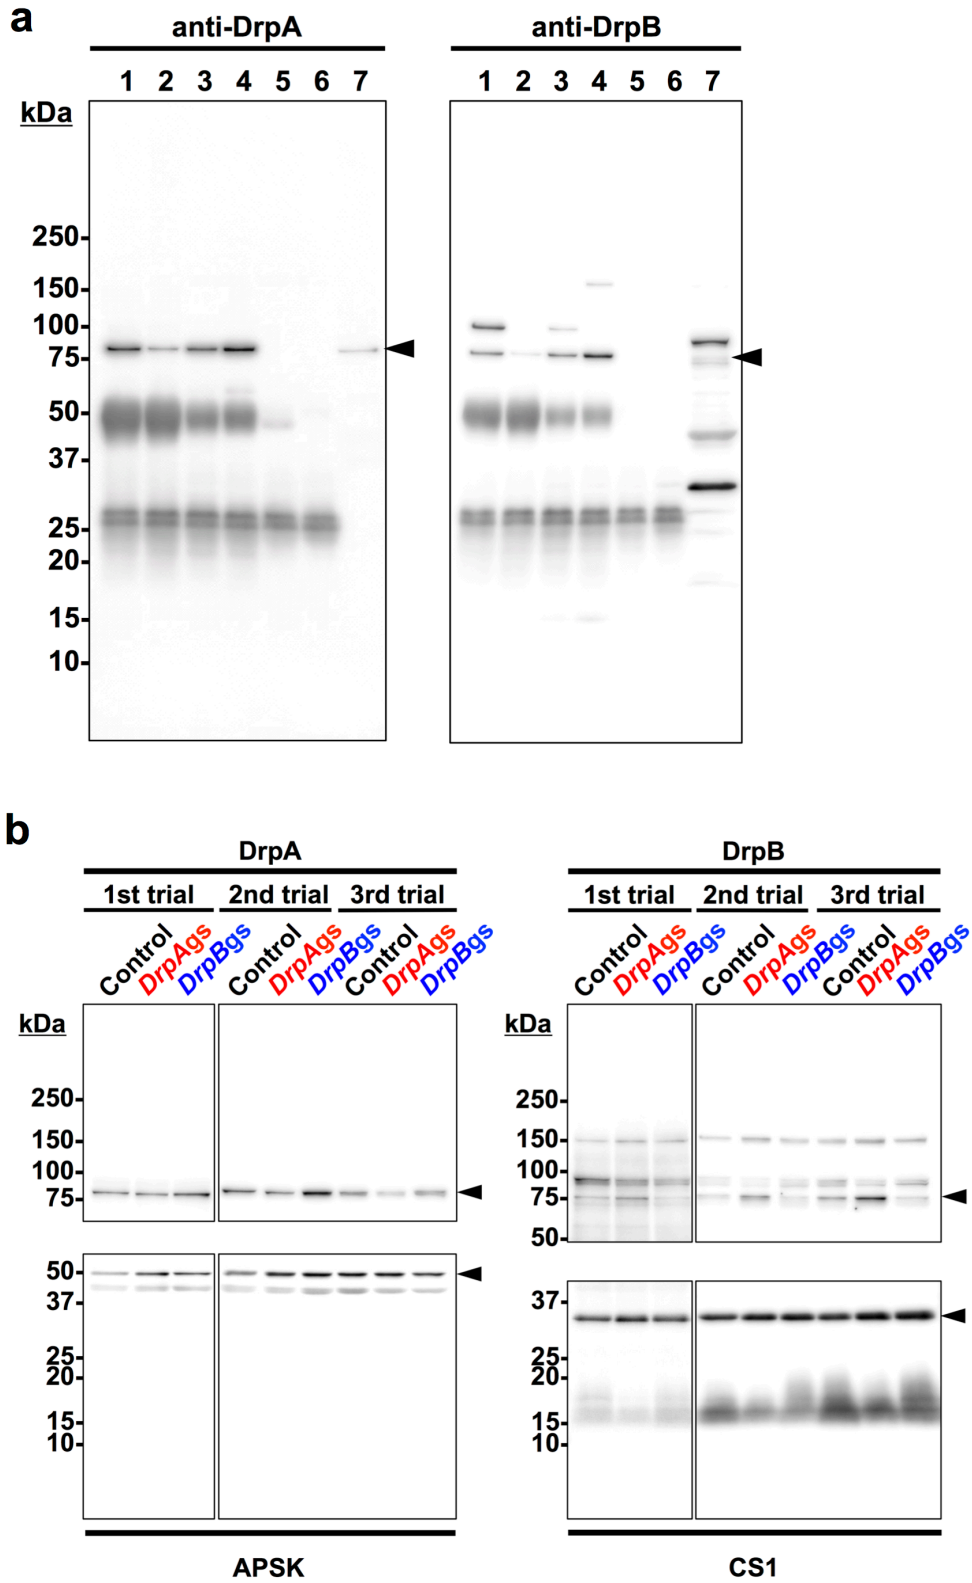



Makiuchi et al. Supplementary Fig. S9

```

EhDrpA 1 MKSLIPVINQLQDVFNTIGV-KGIDLPQIVVVGSQSAGKSSVLESIVGRDFLPRGSGMVT 59
EhDrpB 1 MQRLIPVINSLQDVFTAAGLPNTLPLPQIVVVGSQSSGKSSVLEHVVGKDFLPRGSGIVT 60
* ***** ***** * ***** ***** ** ***** **

EhDrpA 60 KRPLILQLVNLPSTETKEWGEFAHKPGIVYRDFEEIKKEIENETIRLTGTKKTISPVAIR 119
EhDrpB 61 RRPLIVQCVR--SNVAEDYGQFEHTGDRKFTDFGEIRNEITRETER-TCPGRNVSSVPIR 117
**** * * * * * ** ** ** * * * * * * * *

EhDrpA 120 LKISSPYVVDLTLVDLPGLTKISVGSQEKDISNQLKQMVLFIERPNAIILAVTSANVDL 179
EhDrpB 118 LRISSSVVDLTLVDLPGLVKNINGQTAEMVKNLRDMVYEYASPSNALILAVTAGNIDI 177
* *** ***** * * * * * ** ***** * *

EhDrpA 180 ATSDALSIAREVDPDGDRTIGVLTKMDIMDKGTDAMDVLYGRVYFLKLGYIGVLNRSQHD 239
EhDrpB 178 ANSDALQVAKDVDPDGERTIGVLTKLDLEDKGTNSMDVLMGRVYFLKLGYIGVNRSQQD 237
* **** * ***** ***** * **** ***** ***** ***** ***** *

EhDrpA 240 IDTNVPIKTALTKEKEWFSNHPIYSKIADRLGIPYLTKTLNEILMQHIMKTLPSLRITIT 299
EhDrpB 238 INNGVDVKTSLRHEKEFFENHPVYCSIAERMGTEYMVNRLNVLLLQHIQKCLPGLKQQIN 297
* * * * * * * * * * * * * * * * * * * * * * * * * *

EhDrpA 300 EMLNKTKLEYNKFAIEFDQKDVAL-LEKVIEYCTSIQQTISGEKFDIEKHELIGGAKIFD 358
EhDrpB 298 QCYEKARSRYEDIKPD-DENLLSLSLQQIMKFSGSFAAALNGTDTNIHTHEISGGAKIFS 356
* * * * * * * * * * * * * * * * * * * * * * * * * *

EhDrpA 359 VFENVYRPIIDQLDLIKEISDKDIKTAMKNTEGVNSALFLSQAAFEILVKQIDKFTDSS 418
EhDrpB 357 VFENNFRPTIDSQDILSGIKDVIDLTAIKNASGTRPCLYVPQSAFENLISKQVRNFEGTC 416
**** ** ** * * * * * * * * * * * * * * * * * *

EhDrpA 419 QQCVDKIRKEMSNIFTYVASEVVVRYAKLRDAIIIASDNVLDKNLKTHEMVKNLIDIEE 478
EhDrpB 417 HNCVDNVYREMKVIVGKIAKDNIEKYDRFREALIQASTEVMNDYMTQTHKMVQDLIDIEA 476
*** ** * * * * * * * * * * * * * * * * * * * *

EhDrpA 479 SYINTIHPDFDATEIMLNAGINSATPSNEQKPPVVTQAPPKPIQQPTTKPPKQSPSKG 538
EhDrpB 477 DYINTSHPDFTTKVLKEADEAMKTPQDGIDTIVTIDPNNTTNAQYEAKPVK-----S 531
**** ***** * * ** * * * * * * * * * *

EhDrpA 539 GFWFASKASDENEDEDNETQKQTTPSVPVQPEPKVEPIVISATDTKEQRNIKMMRELTR 598
EhDrpB 532 SFFAGQINKNQAKPQQHVPKESITSIRVDHTNQREMREINLIRNLCKDYLLIVR---K 588
* * * * * * * * * * * * * * * *

EhDrpA 599 SYLNIVRKSIEDFVPKAIMHFLINQTCKDL-QKALVEELYKSDKINDLMSESPAITTKRE 657
EhDrpB 589 SIKDLVPKAVIHFLVFKTRDSLQKELIKKLYNEALLQDLL--AENPAIVNERKVVVKQNL 646
* * * * * * * * * * * * * * * * * * * *

EhDrpA 658 MLKKNLEALQKAYNILEGIVTIKVN 682
EhDrpB 647 ALKKALDIINQVRDQCF----- 663
*** *

```

Makiuchi et al. Supplementary Fig. S10

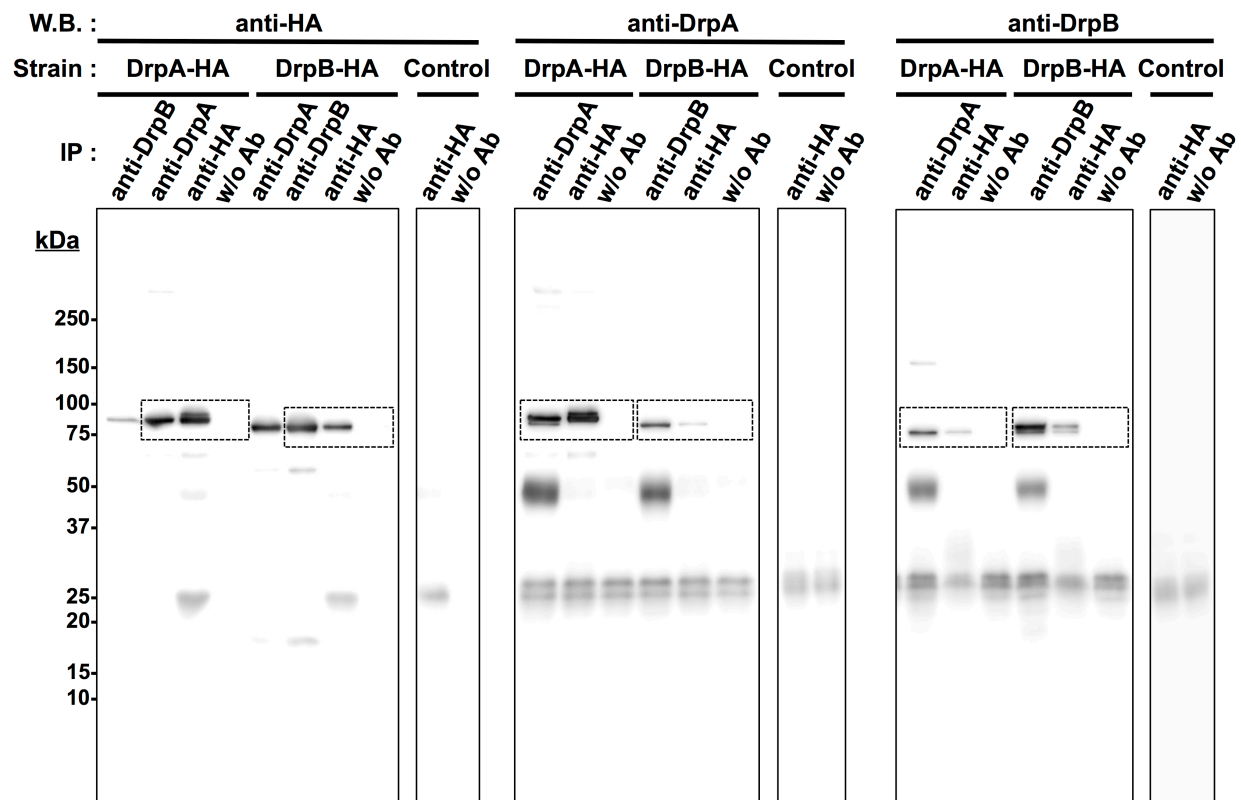

Makiuchi et al. Supplementary Fig. S11

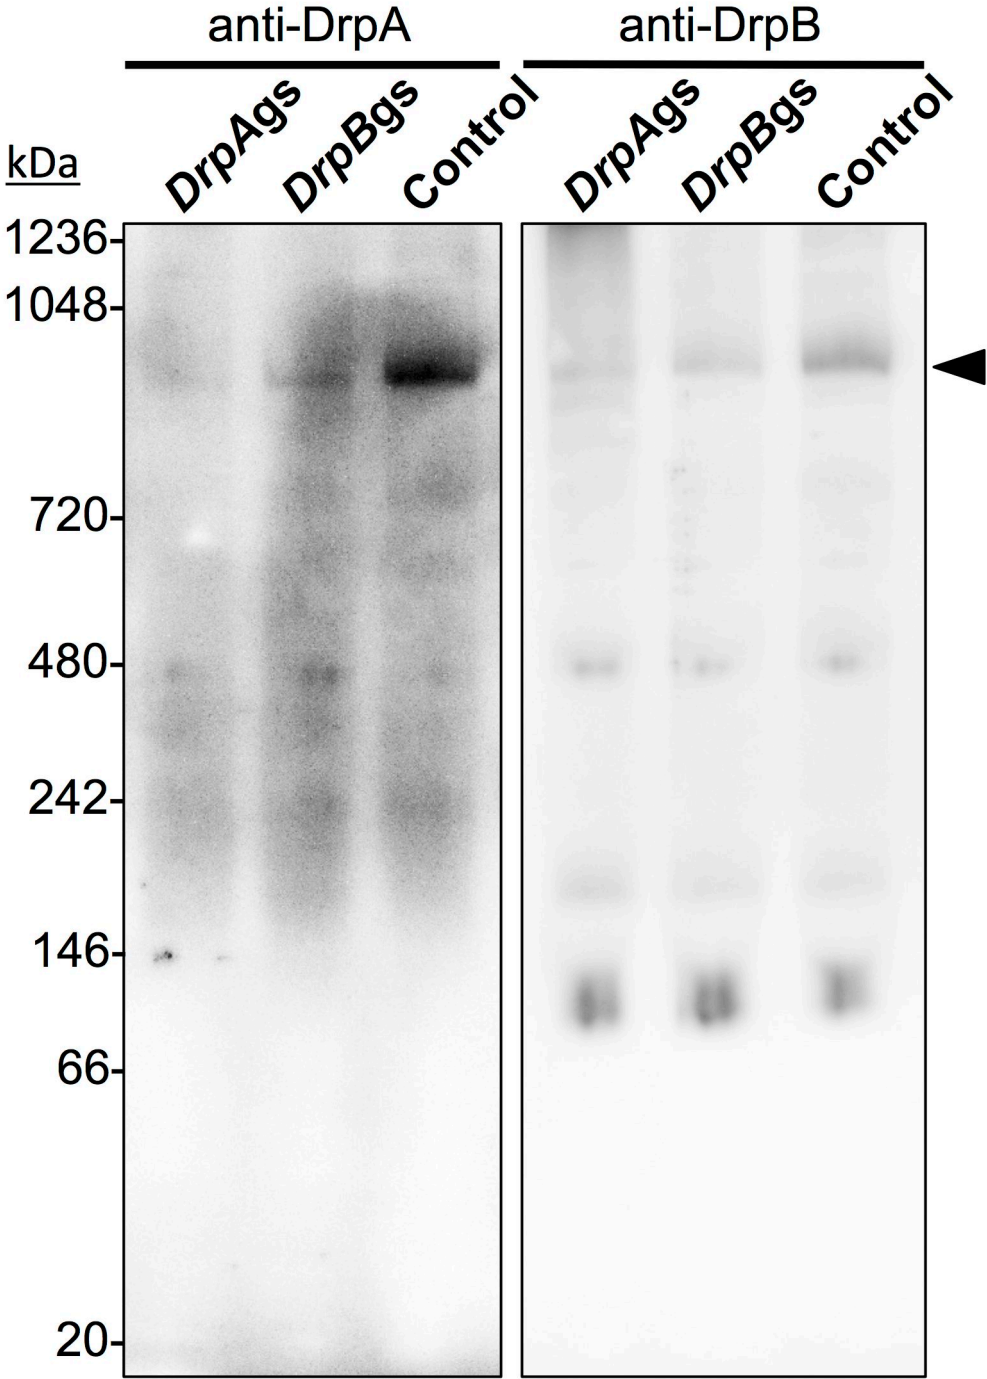

Makiuchi et al. Supplementary Fig. S12

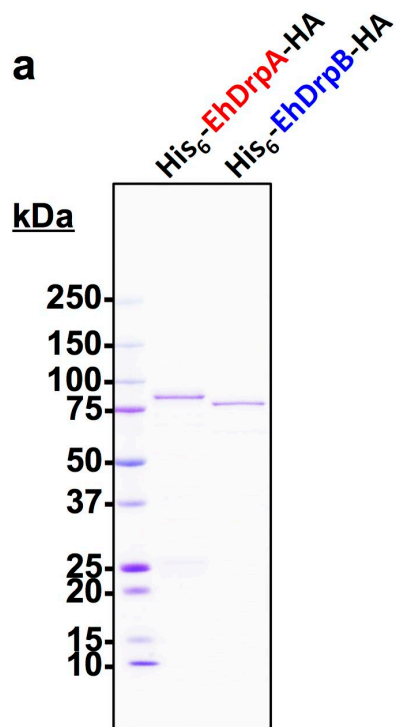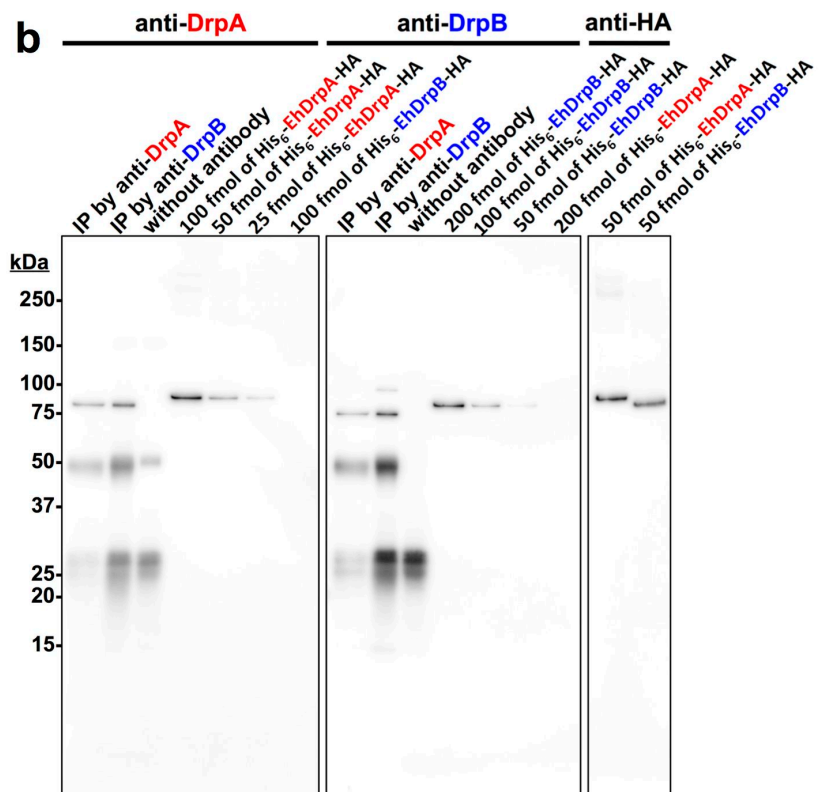

Makiuchi et al. Supplementary Fig. S13

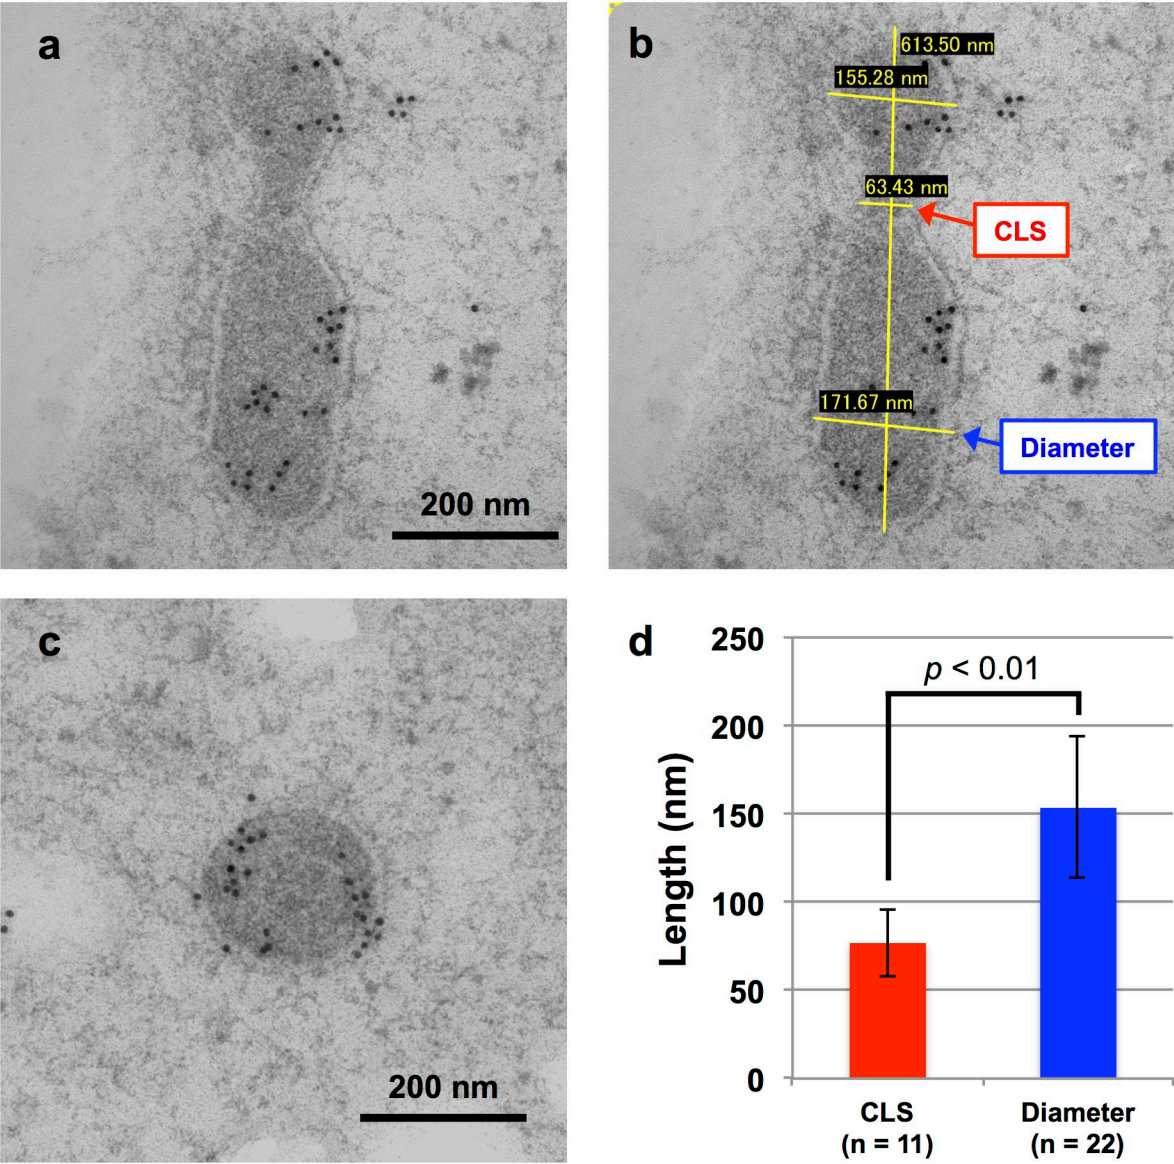



Makiuchi et al. Supplementary Fig. S14

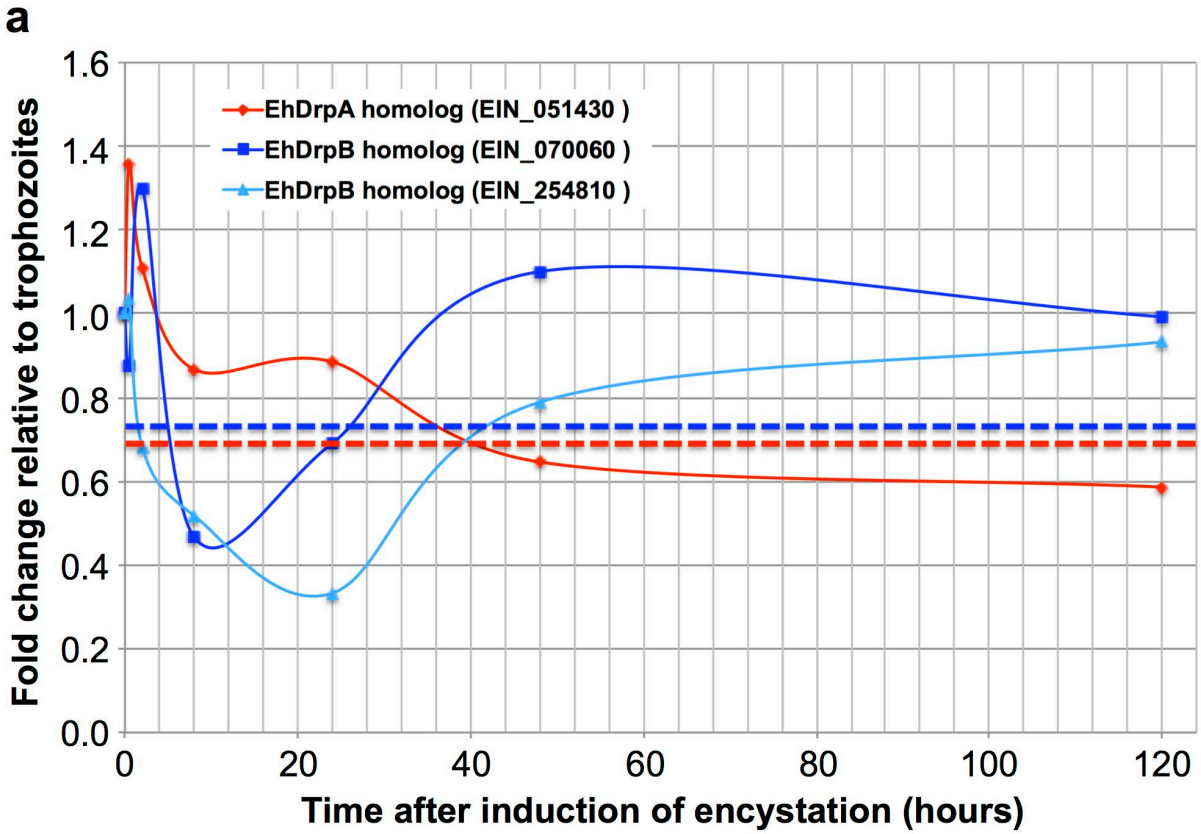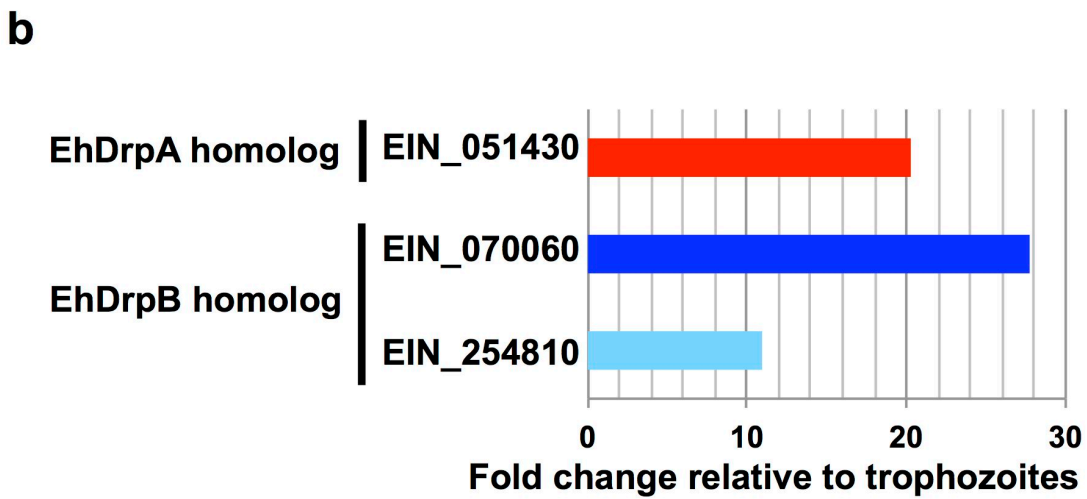

Makiuchi et al. Supplementary Fig. S15

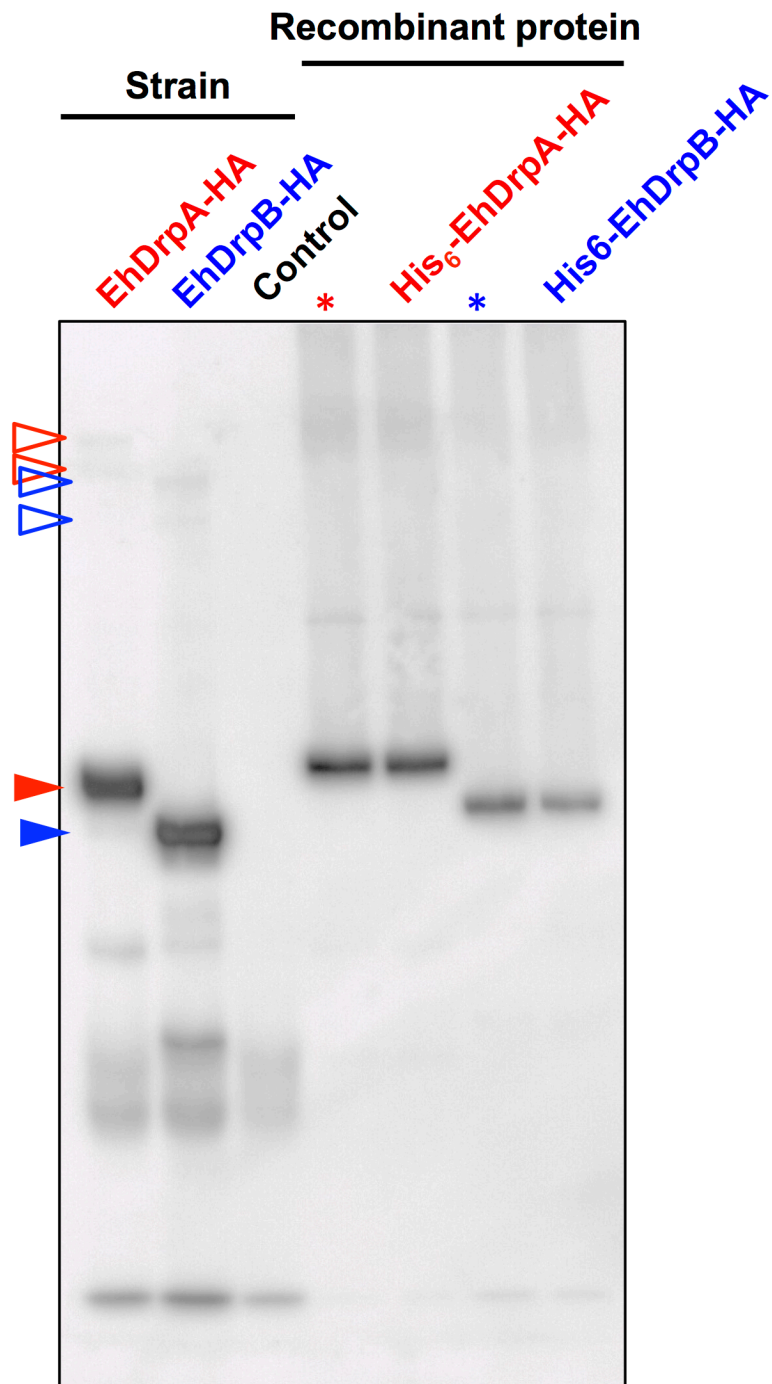

**Supplementary Table. S1: List of proteins known to be involved in mitochondrial dynamics**

| Function                                               | Main components                    | Mammals       | Yeast                     | Dictyostelium              | Entamoeba                 | Algae            |
|--------------------------------------------------------|------------------------------------|---------------|---------------------------|----------------------------|---------------------------|------------------|
| Outer membrane fission (1)                             | Dynamin-related protein1 (Drp1)    | Drp1          | Dnm1                      | Dynamin A?<br>(Ref. 2 & 3) | Unknown<br>(4 candidates) | Dnm1             |
| DRP receptor protein on outer membrane (1)             | Fission protein 1 (Fis1)           | Fis1          | Fis1                      | Unknown                    | Unknown<br>(no homolog)   | Fis1             |
| Mammalian DRP adaptor on outer membrane (1)            | Mitochondrial fission factor (Mif) | Mif           | Unknown                   | Unknown                    | Unknown<br>(no homolog)   | Unknown          |
|                                                        | MID49 / MID51                      | MID49 / MID51 | Unknown                   | Unknown                    | Unknown<br>(no homolog)   | Unknown          |
| Yeast Dnm1 adaptor on outer membrane (1)               | Mdv1 / Caf4 / Num1 / Mdm36         | Unknown       | Mdv / Caf4 / Num1 / Mdm36 | Unknown                    | Unknown<br>(no homolog)   | Mda1 / - / - / - |
| Inner membrane fission (4)                             | FisZ                               | Unknown       | Unknown                   | FisZ                       | Unknown<br>(no homolog)   | FisZ             |
| Outer membrane fusion (1)                              | Mitofusin1 / 2 (Mfn1 / Mfn 2)      | Mfn1 / Mfn2   | Fzo1                      | Unknown                    | Unknown<br>(no homolog)   | Fzo1             |
| Mediator for the interaction between Fzo1 and Mgm1 (5) | Ugo1                               | Unknown       | Ugo1                      | Unknown                    | Unknown<br>(no homolog)   | Ugo1             |
| Inner membrane fusion (1)                              | Optic atrophy 1 (Opa1)             | Opa1          | Mgm1                      | Unknown                    | Unknown<br>(no homolog)   | Mgm1             |

**Note:**

- (1) Roy, M., Reddy, P. H., Iijima, M. & Sesaki, H. Mitochondrial division and fusion in metabolism. *Curr. Opin. Cell Biol.* **33**, 111-118, doi:10.1016/j.cob.2015.02.001 (2015) (This list is based on this review.) (Ref. No. 13)
- (2) Wienke, D. C., Knetsch, M. L., Neuhaus, E. M., Reedy, M. C. & Manstein, D. J. Disruption of a dynamin homologue affects endocytosis, organelle morphology, and cytokinesis in *Dictyostelium discoideum*. *Mol. Biol. Cell* **10**, 225-243 (1999). (Ref. No. 14)
- (3) Schimmel, B. G., Berbusse, G. W. & Naylor, K. Mitochondrial fission and fusion in *Dictyostelium discoideum*: a search for proteins involved in membrane dynamics. *BMC Res. Notes* **5**, 505, doi:10.1186/1756-0500-5-505 (2012). (Ref. No. 15)
- (4) Leger, M. M. et al. An ancestral bacterial division system is widespread in eukaryotic mitochondria. *Proc. Natl. Acad. Sci. U. S. A.* **112**, 10239-10246, doi:10.1073/pnas.1421392112 (2015). (Ref. No. 16)
- (5) Sesaki, H. & Jensen, R. E. Ugo1p links the Fzo1p and Mgm1p GTPases for mitochondrial fusion. *J. Biol. Chem.* **279**, 28298-28303, doi:10.1074/jbc.M401363200 (2004). (Ref. No. 17)



Supplementary Table. S2: List of primers

| Purpose                                                                                         | Template for PCR | Sequence                                                                                               | Direction              | Underline                                                | Mention                                                                             |
|-------------------------------------------------------------------------------------------------|------------------|--------------------------------------------------------------------------------------------------------|------------------------|----------------------------------------------------------|-------------------------------------------------------------------------------------|
| Cloning into the <i>Bgl</i> II site of pEhEx/HA                                                 | pEhHydrR O Cass  | 5'-ACACATPAAAGATCCATGCTAGATTAGATRAAG-3'<br>5'-ATGGATACATAGATCTTGAAATTCCTATCACTGATAG-3'                 | sense<br>antisense     | for In-Fusion® system<br>for In-Fusion® system           | for the removal of <i>Bgl</i> II restriction site<br><i>Bgl</i> II restriction site |
| Cloning of <i>EhDrpA</i> gene into pEhEx/HA digested by <i>Bgl</i> II                           | cDNA             | 5'-CGGGATCCATCAAAAGTCTTATCCAGTTAATAAC-3'<br>5'-CGGGATCCATTAACITTTGATTTAACAATTCCTTC-3'                  | sense<br>antisense     |                                                          | <i>Bam</i> HI restriction site<br><i>Bam</i> HI restriction site                    |
| Cloning of <i>EhDrpB</i> gene into pEhEx/HA digested by <i>Bgl</i> II                           | cDNA             | 5'-CGGGATCCGAAAGATTTCTCTGTAATTAATAG-3'<br>5'-CGGGATCCGAAAGATTTCTTACTTCTTACTGATTA-3'                    | sense<br>antisense     |                                                          | <i>Bam</i> HI restriction site<br><i>Bam</i> HI restriction site                    |
| Cloning of <i>EhDrpC</i> gene into pEhEx/HA digested by <i>Bgl</i> II                           | cDNA             | 5'-CGGGATCCATGACAAACGACATGAAAGAAATC-3'<br>5'-CGGGATCCATTAATTTACTTCCATAGCGTTCTTA-3'                     | sense<br>antisense     |                                                          | <i>Bam</i> HI restriction site<br><i>Bam</i> HI restriction site                    |
| Cloning of <i>EhDrpD</i> gene into pEhEx/HA digested by <i>Bgl</i> II                           | cDNA             | 5'-GTCGAGATCTATGAGCTCAACACAAAGTTGTTAG-3'<br>5'-GTCGAGATCTAACAATACCTTTTTTTCATTTGGAG-3'                  | sense<br>antisense     |                                                          | <i>Bgl</i> II restriction site<br><i>Bgl</i> II restriction site                    |
| Cloning of <i>EhDrpA</i> (K38A) gene into pEhTex/HA digested by <i>Bgl</i> II and <i>Xho</i> I  | pEhEx/EhDrpA-HA  | 5'-GAGAAATTCAGATCATGAAAGTCTTTATTTC-3'<br>5'-AGATGATGCTGCACGACTTTTC-3'                                  | sense<br>antisense     | for In-Fusion® system<br>for In-Fusion® system           | for the mutation form Lys to Ala<br>for the mutation form Lys to Ala                |
| Cloning of <i>EhDrpB</i> (K39A) gene into pEhTex/HA digested by <i>Bgl</i> II and <i>Xho</i> I  | pEhEx/EhDrpB-HA  | 5'-SCTGGTGGATCATCTGTATFAG-3'<br>5'-GAAGATTCACCTCGATTACC-3'                                             | sense<br>antisense     | for In-Fusion® system<br>for In-Fusion® system           | for the mutation form Lys to Ala<br>for the mutation form Lys to Ala                |
| Cloning of <i>EhDrpC</i> (K164A) gene into pEhTex/HA digested by <i>Bgl</i> II and <i>Xho</i> I | pEhEx/EhDrpC-HA  | 5'-GAGAAATTCAGATCATGAAAGTAAATTAATTC-3'<br>5'-TGRAAGTCTCCAGATGACTG-3'                                   | sense<br>antisense     | for In-Fusion® system<br>for In-Fusion® system           | for the mutation form Lys to Ala<br>for the mutation form Lys to Ala                |
| Cloning of <i>EhDrpD</i> (K121A) gene into pEhTex/HA digested by <i>Bgl</i> II and <i>Xho</i> I | pEhEx/EhDrpD-HA  | 5'-TCTGGATGCACTCTCTAGTTAG-3'<br>5'-GAAGATTCACCTCGATTACC-3'                                             | sense<br>antisense     | for In-Fusion® system<br>for In-Fusion® system           | for the mutation form Lys to Ala<br>for the mutation form Lys to Ala                |
| Cloning of <i>EhDrpD</i> (K121A) gene into pEhTex/HA digested by <i>Bgl</i> II and <i>Xho</i> I | pEhEx/EhDrpD-HA  | 5'-GAGAAATTCAGATCATGAAAGTAAATTAATTC-3'<br>5'-TCTGGATGCACTCTCTAGTTAG-3'                                 | sense<br>antisense     | for In-Fusion® system<br>for In-Fusion® system           | for the mutation form Lys to Ala<br>for the mutation form Lys to Ala                |
| Making <i>DrpAgs</i> vector                                                                     | pEhEx/EhDrpA-HA  | 5'-CAGAGCTTCAAGATCATGAAAGTCTTTATTTC-3'<br>5'-CAGAGCTTCAAGATCATGAAAGTCTTTATTTC-3'                       | antisense<br>antisense | for In-Fusion® system<br>for In-Fusion® system           | <i>Sst</i> I restriction site<br><i>Sac</i> I restriction site                      |
| Making <i>DrpBgs</i> vector                                                                     | pEhEx/EhDrpB-HA  | 5'-CCAGGCTTCAAGATCATGAAAGTCTTTATTTC-3'<br>5'-CCAGGCTTCAAGATCATGAAAGTCTTTATTTC-3'                       | sense<br>antisense     | for In-Fusion® system<br>for In-Fusion® system           | <i>Sst</i> I restriction site<br><i>Sac</i> I restriction site                      |
| Making vector for the expression of His-EhDrpA-HA                                               | pEhEx/EhDrpA-HA  | 5'-GCGGATCCGAAAGTCTTTATTTCAGGGAAGAAGTCTTTATTTC-3'<br>5'-GCGGATCCGAAAGTCTTTATTTCAGGGAAGAAGTCTTTATTTC-3' | sense<br>antisense     | TEV protease cleavage site<br>TEV protease cleavage site | <i>Sac</i> I restriction site<br><i>Kpn</i> I restriction site                      |
| Making vector for the expression of His-EhDrpB-HA                                               | pEhEx/EhDrpB-HA  | 5'-GCGGATCCGAAAGTCTTTATTTCAGGGAAGAAGTCTTTATTTC-3'<br>5'-GCGGATCCGAAAGTCTTTATTTCAGGGAAGAAGTCTTTATTTC-3' | sense<br>antisense     | TEV protease cleavage site<br>TEV protease cleavage site | <i>Sac</i> I restriction site<br><i>Kpn</i> I restriction site                      |
